# Supplementary material
Source: Springer Nature journal article supplement (https://www.springermedizin.de/resource/supplementary/13020_2010_88_MOESM2_ESM.pdf/9640950)

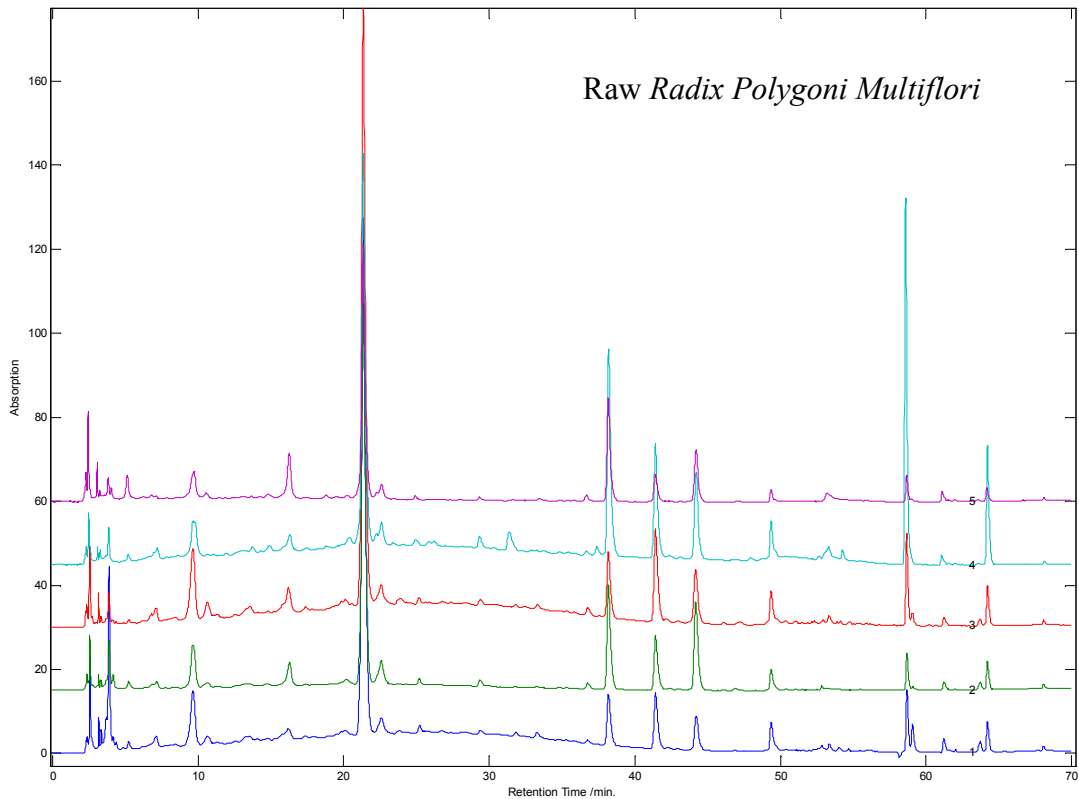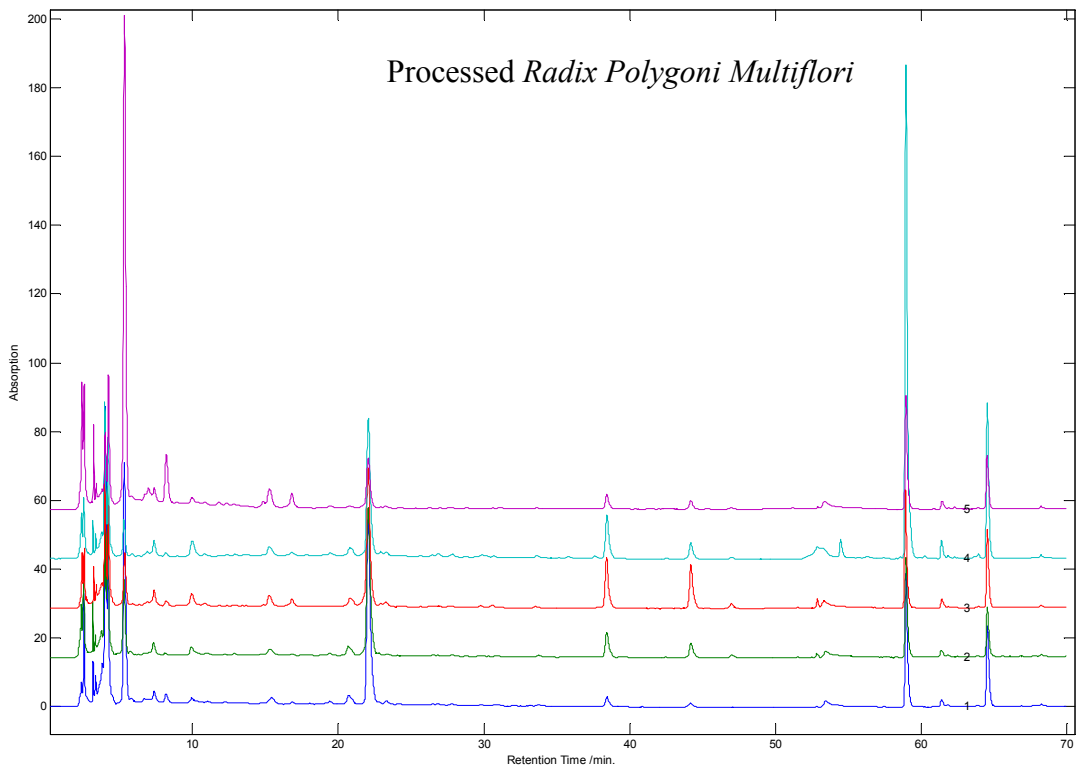

Supplement: MOESM2 [file 9640950]
